# Supplementary material for: Band engineered ternary solid solution CdSxSe1−x-sensitized mesoscopic TiO2 solar cells
Source: Royal Society of Chemistry journal article supplement (doi:10.1039/c2cp40277g), 2012-01-01
Supplement: c2cp40277g.pdf [file c2cp40277g.pdf]

## Supporting Information

# Band Engineered Ternary Solid Solution $\text{CdS}_x\text{Se}_{1-x}$ -Sensitized Mesoscopic $\text{TiO}_2$ Solar Cells

*Md. Anower Hossain,<sup>a</sup> James Robert Jennings,<sup>a</sup> Nripan Mathews,<sup>b</sup> and Qing Wang<sup>a\*</sup>*

<sup>a</sup>Department of Materials Science and Engineering, Faculty of Engineering, NUSNNI-NanoCore,  
National University of Singapore, Singapore 117576,

<sup>b</sup>School of Materials Science and Engineering, Nanyang Technological University, Singapore 639798

**X-ray diffraction patterns of CdS and CdSe-sensitized  $\text{TiO}_2$  electrodes:**

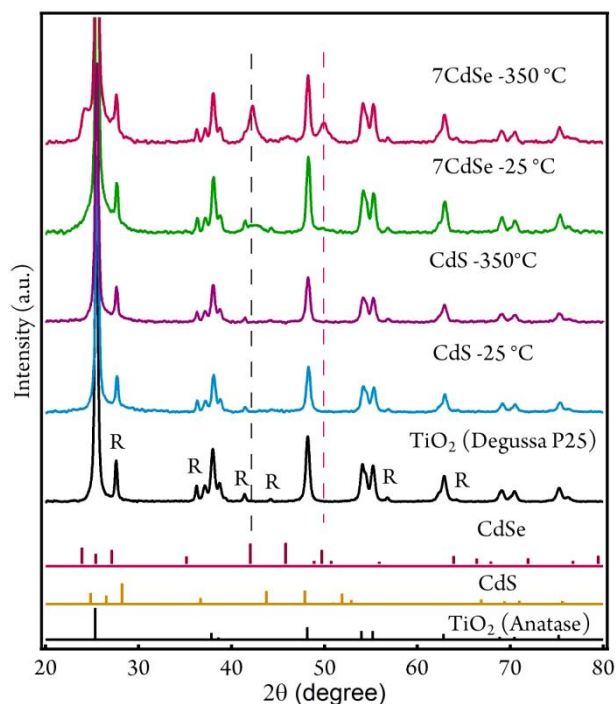

**Figure S1.** X-ray diffraction patterns of CdS and CdSe-sensitized  $\text{TiO}_2$  electrodes made on glass microscope slides before and after heat treatment. The standard  $2\theta$  values for  $\text{TiO}_2$  (Anatase), wurtzite CdS and CdSe crystals are also shown for comparison.

### Photocurrent-Voltage characteristics of cells made with platinised FTO counter electrode:

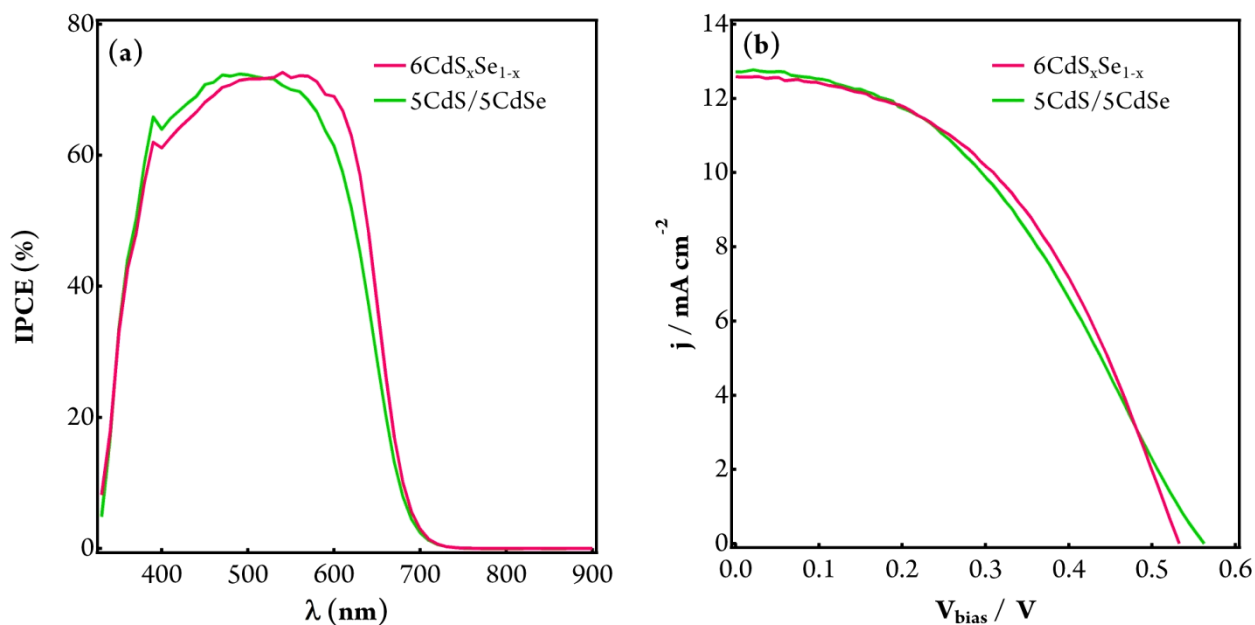

**Figure S2.** IPCE (a) and  $j$ - $V$  characteristics (b) of solar cells made with 6CdS<sub>x</sub>Se<sub>1-x</sub> and 5CdS/5CdSe-sensitized TiO<sub>2</sub> photoanodes (5 μm thick TiO<sub>2</sub> electrodes without scattering layers) with platinised FTO counter electrodes for impedance study.

**Table S1.** Characteristics of 6CdS<sub>x</sub>Se<sub>1-x</sub> and 5CdS/5CdSe-sensitized TiO<sub>2</sub> solar cells under simulated AM1.5 100 mW cm<sup>-2</sup> illumination made with platinised FTO cathode and TiO<sub>2</sub> electrodes (5 μm transparent Degussa P25 layers) without scattering layers.

| Photoanode              | Sensitizer                          | V <sub>oc</sub> (V) | $j_{sc}$ (mA.cm <sup>-2</sup> ) | $ff$ (%) | $\eta$ (%) |
|-------------------------|-------------------------------------|---------------------|---------------------------------|----------|------------|
| TiO <sub>2</sub> (5 μm) | 6CdS <sub>x</sub> Se <sub>1-x</sub> | 0.539               | 12.57                           | 43.83    | 2.97       |
|                         | 5CdS/5CdSe                          | 0.563               | 12.70                           | 41.76    | 3.00       |
